# Supplementary material
Source: publisher figshare collection journal article supplement (https://frontiersin.figshare.com/ndownloader/files/14876438)
Supplement: Supplementary file [file 14876438]

**A**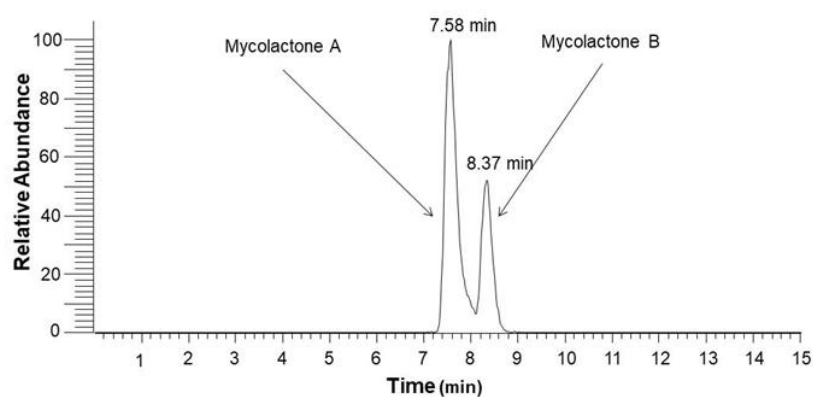**B**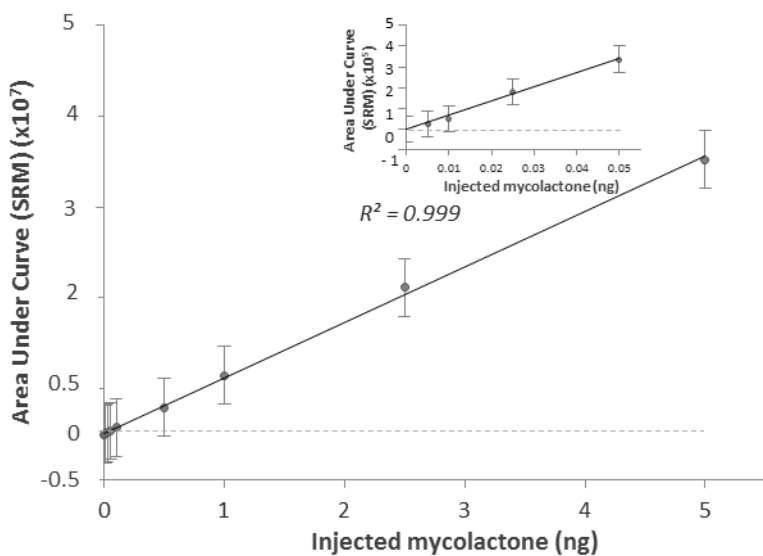

**Supplementary figure 1: Detection and quantification of mycolactone by liquid chromatography coupled to tandem mass spectrometry**

(A) Total ion current (TIC) for mycolactone A/B in selected reaction monitoring (SRM) (MS/MS: 765.5/429.2 UMA) (B) calibration curve.
